# Supplementary material
Source: PubMed Central journal article supplement (PMC5399611)

SUPPLEMENTARY DATA

**Supplementary Figure 1.** Time course of 50% paw withdrawal threshold (A) and RDD (B) in ZDF-fatty rats and their ZDF-lean counterparts. In A, data are presented as group median  $\pm$  IQR of N=9 per group. \*\*P<0.01, \*\*\*P<0.001 versus ZDF lean by two-way ANOVA followed by Bonferroni's *post-hoc* test. In B, data are presented as group mean  $\pm$  SEM of N=9 per group. \*P<0.05 versus ZDF lean by two-way ANOVA followed by Bonferroni's *post-hoc* test.

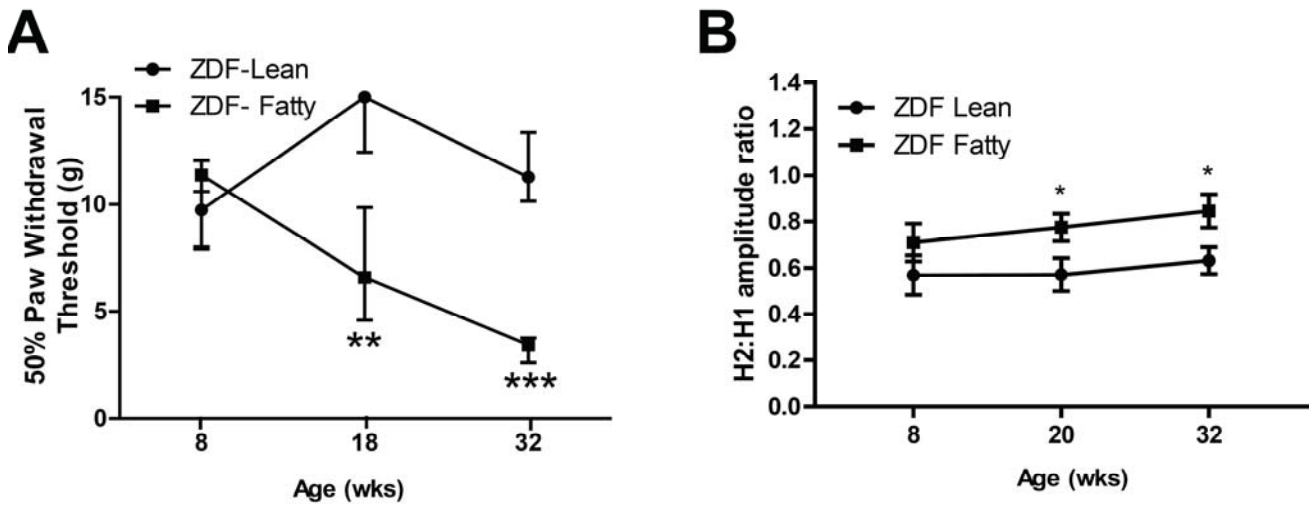

Supplement: DB161181SupplementaryData.pdf [file DB161181SupplementaryData.pdf]
